# Supplementary material for: Preliminary Radiogenomic Evidence for the Prediction of Metastasis and Chemotherapy Response in Pediatric Patients with Osteosarcoma Using 18F-FDG PET/CT, EZRIN, and KI67
Source: MDPI journal article supplement (doi:10.3390/cancers13112671), 2021-05-28
Supplement: s1 [file s1]

# Preliminary Radiogenomic Evidence for the Prediction of Metastasis and Chemotherapy Response in Pediatric Patients with Osteosarcoma Using $^{18}\text{F}$ -FDG PET/CT, *EZRIN*, and *KI67*

Byung-Chul Kim, Jingyu Kim, Kangsan Kim, Byung Hyun Byun, Ilhan Lim, Chang-Bae Kong, Won Seok Song, Jae-Soo Koh and Sang-Keun Woo

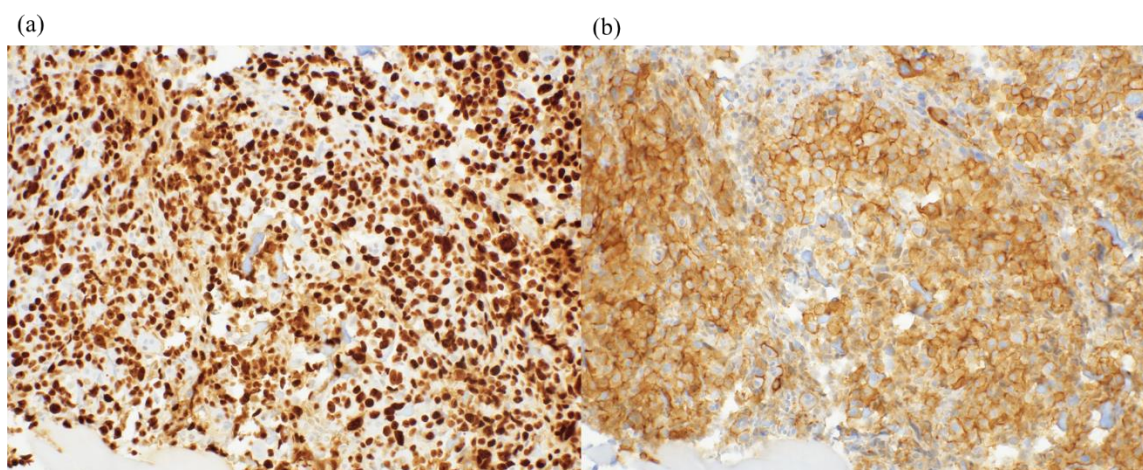

**Figure S1.** Immunohistochemical staining of *KI67* (a) and *EZRIN* (b).

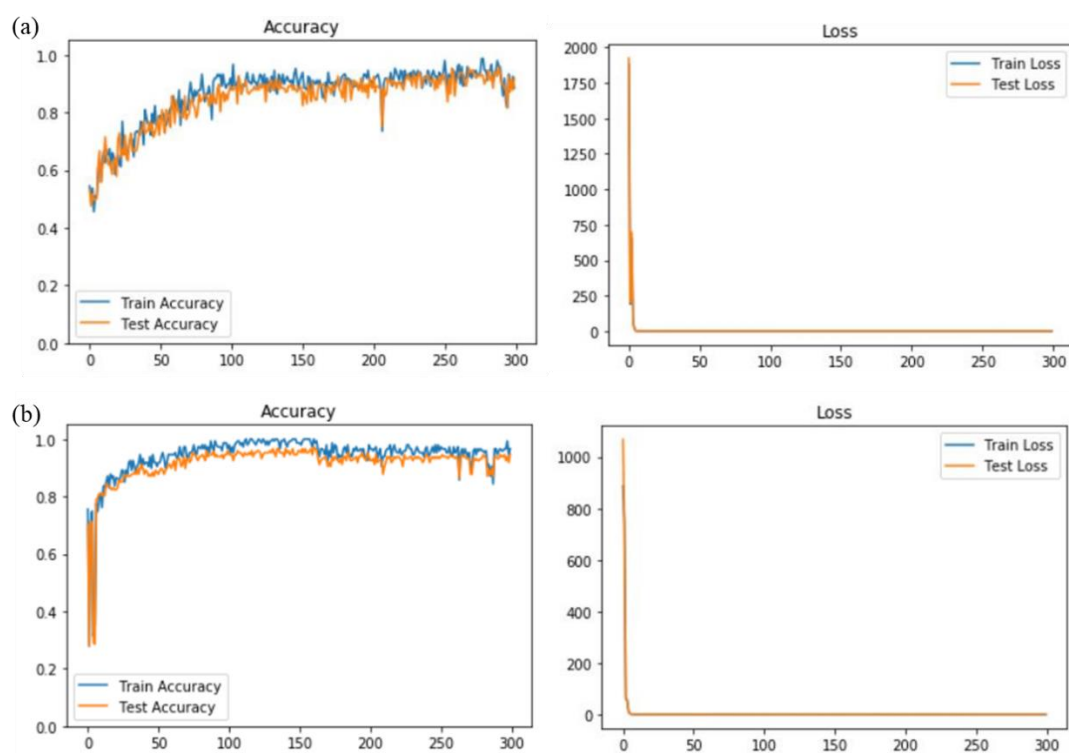

**Figure S2.**  $^{18}\text{F}$ -FDG PET/CT image deep learning accuracy and loss value, (a) Chemotherapy response prediction, (b) Metastasis prediction.

**Table S1.** The AUC values of image texture features for chemotherapy response from 52 pediatric osteosarcoma.

| Feature                     | AUC   |
|-----------------------------|-------|
| "NGLDM_Contrast"            | 0.652 |
| "HISTO_Kurtosis"            | 0.647 |
| "GLZLM_LZHGE"               | 0.644 |
| "CONVENTIONAL_SUVmin (SUV)" | 0.616 |
| "GLRLM_RP"                  | 0.609 |
| "GLCM_Homogeneity"          | 0.604 |
| "GLRLM_SRE"                 | 0.604 |

**Table S2.** The AUC values of image texture features for metastasis from 52 pediatric osteosarcoma.

| Feature                                            | AUC   |
|----------------------------------------------------|-------|
| "GLZLM_SIZE"                                       | 0.68  |
| "HISTO_Entropy_log2"                               | 0.624 |
| "HISTO_Energy"                                     | 0.624 |
| "HISTO_Entropy_log10"                              | 0.623 |
| "CONVENTIONAL_TLG (mL) (value only for PET or NM)" | 0.622 |
| "GLZLM_SZLGE"                                      | 0.622 |
| "GLZLM_ZLNU"                                       | 0.62  |
| "SHAPE_Compacity"                                  | 0.619 |
| "CONVENTIONAL_SUVmin (SUV)"                        | 0.618 |
| "GLCM_Entropy_log2"                                | 0.617 |
| "GLCM_Entropy_log10"                               | 0.616 |
| "HISTO_Skewness"                                   | 0.613 |
| "GLZLM_GLNU"                                       | 0.608 |
| "GLCM_Energy"                                      | 0.607 |
| "SHAPE_Sphericity"                                 | 0.603 |
| "SHAPE_Volume_No_vx"                               | 0.6   |
| "GLRLM_RLNU"                                       | 0.6   |

**Table S3.** 47 image texture features from <sup>18</sup>F-FDG PET/CT.

|                                                                                           |       |
|-------------------------------------------------------------------------------------------|-------|
| image texture features(IBSI)                                                              | AUC   |
| SUVmax                                                                                    | 0.424 |
| SUVmean                                                                                   | 0.453 |
| SUVmin                                                                                    | 0.64  |
| SUVpeak                                                                                   | 0.436 |
| SUV_SD                                                                                    | 0.4   |
| TLG                                                                                       | 0.362 |
| Gray-Level Co-occurrence Matrix_Contrast(GLCM_contrast)                                   | 0.453 |
| Gray-Level Co-occurrence Matrix_Correlation(GLCM_Correlation)                             | 0.526 |
| Gray-Level Co-occurrence Matrix_DEPRECATED Dissimilarity(GLCM_DEPRECATED Dissimilarity)   | 0.553 |
| Gray-Level Co-occurrence Matrix_Joint Energy(GLCM_Joint Energy)                           | 0.494 |
| Gray-Level Co-occurrence Matrix_Joint Entropy (GLCM_Joint Entropy)                        | 0.54  |
| Gray-Level Co-occurrence Matrix_Difference Entropy(GLCM_Difference Entropy)               | 0.54  |
| Gray-Level Co-occurrence Matrix_DEPRECATED. Homogeneity 1(GLCM_DEPRECATED. Homogeneity 1) | 0.5   |
| Gray Level Run Length Matrix_Gray Level Non-Uniformity (GLRLM_GLN)                        | 0.507 |
| Gray Level Run Length Matrix_High Gray Level Run Emphasis (GLRLM_HGLRE)                   | 0.478 |
| Gray Level Run Length Matrix_Low Gray Level Run Emphasis (GLRLM_LGLRE)                    | 0.568 |
| Gray Level Run Length Matrix_Long Run Emphasis (GLRLM_LRE)                                | 0.499 |
| Gray Level Run Length Matrix_Long Run High Gray Level Emphasis (GLRLM_LRHGLE)             | 0.482 |
| Gray Level Run Length Matrix_Long Run LOW Gray Level Emphasis (GLRLM_LRLGLE)              | 0.557 |
| Gray Level Run Length Matrix_Run Length Non-Uniformity (GLRLM_RLN)                        | 0.465 |
| Gray Level Run Length Matrix_Run Percentage (GLRLM_RP)                                    | 0.568 |
| Gray Level Run Length Matrix_Short Run Emphasis (GLRLM_SRE)                               | 0.56  |
| Gray Level Run Length Matrix_Short Run High Gray Level Emphasis (GLRLM_SRHGLE)            | 0.482 |
| Gray Level Run Length Matrix_Short Run LOW Gray Level Emphasis (GLRLM_SRLGLE)             | 0.565 |
| Gray Level Size Zone Matrix_Gray Level Non-Uniformity (GLSZM_GLN)                         | 0.524 |

|                                                                                |       |
|--------------------------------------------------------------------------------|-------|
| Gray Level Size Zone Matrix_High Gray Level Zone Emphasis (GLSZM_HGLZE)        | 0.454 |
| Gray Level Size Zone Matrix_Low Gray Level Zone Emphasis (GLSZM_LGLZE)         | 0.551 |
| Gray Level Size Zone Matrix_Large Area Emphasis (GLSZM_LAE)                    | 0.491 |
| Gray Level Size Zone Matrix_Large Area High Gray Level Emphasis (GLSZM_LAHGLE) | 0.55  |
| Gray Level Size Zone Matrix_Large Area Low Gray Level Emphasis (GLSZM_LALGLE)  | 0.521 |
| Gray Level Size Zone Matrix_Small Area Emphasis (GLSZM_SAE)                    | 0.546 |
| Gray Level Size Zone Matrix_Small Area High Gray Level Emphasis (GLSZM_SAHGLE) | 0.453 |
| Gray Level Size Zone Matrix_Small Area Low Gray Level Emphasis (GLSZM_SALGLE)  | 0.596 |
| Gray Level Size Zone Matrix_Size-Zone Non-Uniformity (GLSZM_SZN)               | 0.478 |
| Gray Level Size Zone Matrix_Zone Variance (GLSZM_ZV)                           | 0.541 |
| entropy                                                                        | 0.549 |
| entropy_log10                                                                  | 0.547 |
| entropy_log2                                                                   | 0.547 |
| Kurtosis                                                                       | 0.471 |
| Skewness                                                                       | 0.478 |
| Neighbouring Gray Tone Difference Matrix_Busyness (NGTDM_Busyness)             | 0.474 |
| Neighbouring Gray Tone Difference Matrix_Coarseness (NGTDM_Coarseness)         | 0.469 |
| Neighbouring Gray Tone Difference Matrix_Contrast (NGTDM_Contrast)             | 0.568 |
| XSpatialResampling                                                             | 0.617 |
| YSpatialResampling                                                             | 0.617 |
| ZSpatialResampling                                                             | 0.546 |
